# Supplementary material
Source: PubMed Central journal article supplement (PMC1177387)

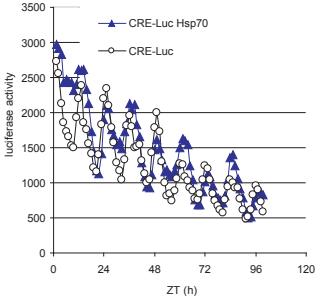

Supplement: pnas_0503937102_2.pdf [file pnas_0503937102_2.pdf]
